compressible flow annular seals. The analysis was based on an extension of the analysis of Nelson and Nguyen (1988). The analysis was used to produce a parametric study on the effect of tilt on the performance of straight and tapered annular seals. The seal configuration analyzed was typical of those found in cryogenic turbopump applications. The results presented support the following conclusions:

- 1) The seal leakage decreases as tilt increases.
- 2) All rotordynamic coefficients increase as tilt increases.
- 3) The whirl frequency ratio increases for substantial values of tilt.
- 4) For the seals investigated herein, the effects of tilt on straight and tapered seals was the same.
- 5) The effects of tilt are not detrimental in cases where the added mass is not significant and the degree of tilt is small.

## References

- Allaire, P. E., Lee, C. P., and Gunter, E. J., 1976, "Dynamics of Short Eccentric Plain Seals with High Axial Reynolds Numbers," *J. Spacecraft*, Vol. 15, No. 6, pp. 341-347.
- Black, H. F., 1969, "Effects of Hydraulic Forces in Annular Pressure Seals on the Vibration of Centrifugal Pump Rotors," *Journal of Mechanical Engineering Science*, Vol. 11, No. 2, pp. 206-213.
- Black, H. F., and Jenssen, D. N., 1970, "Dynamic Hybrid Properties of Annular Pressure Seals," *Proc. Journal of Mechanical Engineering*, Vol. 184, pp. 92-100.
- Black, H. F., and Jenssen, D. N., 1971, "Effects of High Pressure Ring Seals on Pump Rotor Vibrations," ASME Paper No. 71-WA/FE-38.
- Black, H. F., Allaire, P. E., and Barrett, L. E., 1981, "The Effect of Inlet Flow Swirl on the Dynamic Coefficients of High Pressure Annular Clearance Seals," Ninth International Conference of Fluid Sealing, BHRA Fluid Engineering, Leeuwenhorst, The Netherlands, Apr.
- Chen, W. C., and Church, S., 1984, "HPOTP Preburner Pump Impeller Rear Seal Water Test," Rocketdyne Internal Letter #RH-4173-4509.
- Chen, W. C., and Jackson, E. D., 1985, "Eccentricity and Misalignment Effects on the Performance of High Pressure Annular Seals," *ASLE Transactions*, Vol. 28, No. 1, Jan. pp. 104-110.
- Childs, D. W., 1982, "Rotordynamic Moment Coefficients for Finite Length Turbulent Seals," *Proceedings of the IFTOMM Conference*, Rome, Sept., pp. 371-378.
- Childs, D. W., 1983a, "Dynamic Analysis of Turbulent Annular Seals Based on Hirs' Lubrication Equation," ASME JOURNAL OF LUBRICATION TECHNOLOGY, Vol. 105, No. 3, pp. 429-436.
- Childs, D. W., 1983b, "Finite Length Solutions for Rotordynamic Coefficients of Turbulent Annular Seals," ASME JOURNAL OF LUBRICATION TECHNOLOGY, Vol. 105, No. 3, pp. 437-444.
- Childs, D. W., 1984, "Finite-Length Solutions for Rotordynamic Coefficients of Constant Clearance and Convergent-Tapered Annular Seals," Third International Conference on Vibrations and Rotating Machinery, York, England, September 10-12.
- Childs, D. W. and Kim, C.-H., 1985, "Analysis and Testing for Rotordynamic Coefficients of Turbulent Annular Seals with Directionally Homogeneous Surface-Roughness Treatment for Rotor and Stator Elements," ASME JOURNAL OF TRIBOLOGY, Vol. 107, July, pp. 296-306.
- Fenwick, J., DiJulio, R., Ek, M. C., Ehrigott, R., Green, H., and Shaolian, S., 1982, "Linear Force and Moment Equations for an Annular Smooth Shaft Seal Perturbed Both Angularly and Laterally," NASA CP2250, Rotordynamic Instability Problems in High Performance Turbomachinery, pp. 130-146.
- Fleming, D. P., 1977, "High Stiffness Seals for Rotor Critical Speed Control," ASME Paper No. 77-DET-10.
- Fleming, D. P., 1979, "Stiffness of Straight and Tapered Annular Gas Seals," ASME JOURNAL OF LUBRICATION TECHNOLOGY, Vol. 101, No. 3, pp. 349-355.
- Fleming, D. P., 1980, "Damping in Ring Seals for Compressible Fluids," NASA CP2133, Rotordynamic Instability Problems in High Performance Turbomachinery, pp. 169-188.
- Iwatsubo, T., and Yang, B. S., 1988, "The Effects of Elastic Deformation on Seal Dynamics," ASME Journal of Vibration, Acoustics, Stress, and Reliability in Design, Vol. 110, Jan., pp. 59-64.
- Iwatsubo, T., Matsumoto, T., and Tsujimoto, Y., 1989, "Calculations of Dynamic Forces in Liquid Annular Seal," ASME publication DE-Vol. 18-2, Machinery Dynamics—Applications and Vibration Control Problems, pp. 135-139.
- Jenssen, D. N., 1970, "Dynamics of Rotor Systems Embodying High Pressure Ring Seals," PhD. dissertation, Heriot-Watt University, Edinburgh, Scotland, July.
- Kanemori, Y., and Iwatsubo, T., 1989, "Experimental Study of Dynamic Fluid Forces and Moments for a Long Annular Seal," ASME publication DE-Vol. 18-2, Machinery Dynamics—Applications and Vibration Control Problems, pp. 141-147.
- Lomakin, A., 1958, "Calculation of Critical Speed and Securing the Dynamic Stability of the Rotor of Hydraulic High Pressure Machines with Reference to Forces Arising in the Seal Gaps," *Energomashinostroenie*, Vol. 4, No. 4, pp. 1-5, April.
- Nelson, C. C., 1984, "Analysis for Leakage and Rotordynamic Coefficients of Surface Roughened Tapered Annular Gas Seals," ASME Journal of Engineering for Power, Vol. 106, No. 4, Oct., pp. 927-934.
- Nelson, C. C., 1985, "Rotordynamic Coefficients for Compressible Flow in Tapered Annular Seals," ASME JOURNAL OF TRIBOLOGY, Vol. 107, No. 3, pp. 318-315.
- Nelson, C. C., and Nguyen, D. T., 1987, "Comparison of Hirs' Equation with Moody's Equation for Determining Rotordynamic Coefficients of Annular Pressure Seals," ASME JOURNAL OF TRIBOLOGY, Vol. 108, Jan., pp. 144-148.
- Nelson, C. C., and Nguyen, D. T., 1990a, "Analysis of Eccentric Annular Incompressible Seals: Part I—A New Solution Using Fast Fourier Transforms for Determining Hydrodynamic Force," ASME JOURNAL OF TRIBOLOGY, Vol. 110, Apr., pp. 354-360.
- Nelson, C. C., and Nguyen, D. T., 1990b "Analysis of Eccentric Annular Incompressible Seals: Part 2—Effects of Eccentricity on Rotordynamic Coefficients," ASME JOURNAL OF TRIBOLOGY, Vol. 110, Apr., pp. 361-366.
- San Andres, L., 1990, "Effect of Eccentricity on the Static and Dynamic Performance of a Turbulent Hybrid Bearing," Proceedings of the 6th Workshop on Rotordynamic Instability Problems in High-Performance Turbomachinery, Texas A&M University, May 21-23, pp. 427-443.
- Scharrer, J. K., and Nunez, D. J., 1989, "The SSME HPFTP Wavy Interstage Seal: Part I—Seal Analysis," ASME publication DE-Vol. 18-2, Machinery Dynamics—Applications and Vibration Control Problems, pp. 95-100.
- Scharrer, J. K., and Nelson, C. C., 1990a, "Rotordynamic Coefficients for Partially Tapered Annular Seals: Part I—Incompressible Flow," ASME Paper 90-Trib-25 accepted for publication in ASME JOURNAL OF TRIBOLOGY.
- Scharrer, J. K., and Nelson, C. C., 1990b, "Rotordynamic Coefficients for Partially Tapered Annular Seals: Part II—Compressible Flow," ASME Paper 90-Trib-26 accepted for publication in ASME JOURNAL OF TRIBOLOGY.
- Scharrer, J. K., and Nelson, C. C., 1990c, "Rotordynamic Coefficients for Partially Roughened Pump Annular Seals," accepted for publication in ASME Journal of Vibrations and Acoustics.
- Scharrer, J. K., and Nelson, C. C., 1990d, "Rotordynamic Coefficients for Partially Roughened Annular Gas Seals," submitted for publication in ASME Journal of Engineering for Gas Turbines and Power.
- Simon, F., and Frene, J., 1988, "Static and Dynamic Characteristics of Turbulent Annular Eccentric Seals: Effect of Convergent-Tapered Geometry and Variable Fluid Properties," ASME Paper 88-Trib-50.
- Yang, B. S., Iwatsubo, T., and Kawai, R., 1984, "A Study on the Dynamic Characteristics of Pump Seal (First Report, In Case of Annular Seals with Eccentricity)," *Bulletin of JSME*, Vol. 27, No. 227, pp. 1047-2053.

## DISCUSSION

### L. San Andres<sup>1</sup>

The paper presents the results of a numerical analysis on the effect of fixed rotor misalignment on the rotordynamic force/displacement coefficients of an incompressible liquid, turbulent flow annular pressure seal. The motion of the fluid in the thin film annular clearance is governed by fully developed, bulk-flow equations with turbulent shear parameters

determined for rough surface seal surface conditions using Moody's friction factor formulae. The present analysis extends earlier work of Nelson et al. (1990b) for analysis of seal performance at arbitrary rotor center positions.

An application related to a LO2 annular seal is presented. Numerical predictions are calculated for 2 uniform clearance seals, and a third with a convergent tapered geometry. The value of stator surface roughness for a diamond knurl pattern used in the calculations is equal to 40 percent of the seal clearance. This value seems to be extremely large and out of

<sup>1</sup>Assistant Professor, Mechanical Engineering Department, Texas A&M University, College Station, TX 77845.

the range for Moody's friction factor model to be valid. Could the authors explain this issue? I would like to add that for the example presented, surface roughness values on the order of 2 percent of seal clearance give similar results as those presented by the authors using the computer program of San Andres (1991). The inlet swirl is taken as 60 percent of the rotor surface speed and the numerical predictions show large values of the cross-coupled stiffness which bring the whirl frequency ratio to values close to 0.60. In this respect, I consider the results rather unusual since the use of a roughened stator surface is precisely desired to reduce leakage and improve the seal dynamic stability characteristics (i.e., reduce WFR). Then, in this application a roughened seal surface is clearly not beneficial which seems rather relevant (if correct). Could the authors explain more in detail this issue?

The whirl frequency ratio formula presented is due to Lund (1965). San Andres (1990) extended the original analysis to include inertia force coefficients. In regard to the WFR it was found that the cross-coupled inertia coefficient,  $M_{XY} > 0$ , has a detrimental effect on the stability ratio.

The investigation has shown that rotor-tilt relative to the seal inlet plane produces a significant increase in direct stiffnesses. This effect could be completely reversed if the tilt is relative to the seal exit plane as some of my recent calculations show. Have the authors also found the same behavior in their studies?

#### Additional References

San Andres, L., "Analysis of Variable Fluid Properties, Turbulent Annular Seals," 1991, ASME JOURNAL OF TRIBOLOGY, October, Vol. 113, pp. 694-702.

Lund, J. W., 1965, "The Stability of an Elastic Rotor in Journal Bearings with Flexible Damped Supports," ASME *Journal of Applied Mechanics*, pp. 911-920.

#### D. Elrod<sup>2</sup>

Nelson and Nguyen (1987) showed that the choice of a friction factor equation affects seal rotordynamic coefficient pre-

<sup>2</sup>Sverdrup Technology, Inc., Marshall Space Flight Center Group.

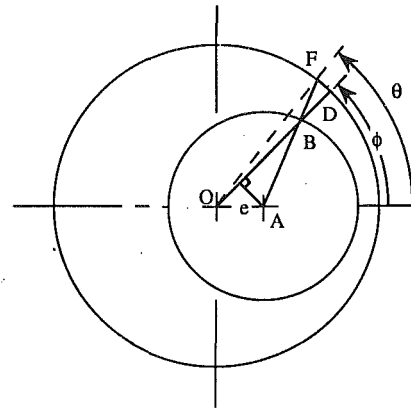

Fig. 13

dictions for nominally centered seals. Would the authors comment on the probability that the predicted dependence of rotordynamic coefficients on tilt is affected significantly by the choice of a friction factor equation?

A better understanding of and appreciation for this work would be gained from plots of the nominal "zeroth-order" pressure profiles around the circumference of the seal. For example, one presumes that the pressure profile at  $\theta = \pi$  differs from that at  $\theta = 0$ . This would lead to a prediction that the stiffness in the tilt direction depends on the direction of perturbation along the axis.

Finally, would the authors clarify the clearance function in Eq. (5)? For the eccentric journal in Fig. 13, the clearances  $BD$  and  $BF$  are

$$BD = R + C_o - (R^2 - e^2 \sin^2 \theta)^{1/2} - e \cos \theta$$

and

$$BF = [(R + C_o - e \cos \theta)^2 + e^2 \sin^2 \theta]^{1/2} - R$$

in which  $R$  is the rotor radius,  $C_o$  is the difference between the stator and rotor radii, and  $e$  is the distance from the stator center to the rotor center. What clearance does Eq. (5) represent?
